# Supplementary material for: Identification in GRMD dog muscle of critical miRNAs involved in pathophysiology and effects associated with MuStem cell transplantation
Source: Springer Nature journal article supplement (doi:10.1186/s12891-016-1060-5), 2016-05-11

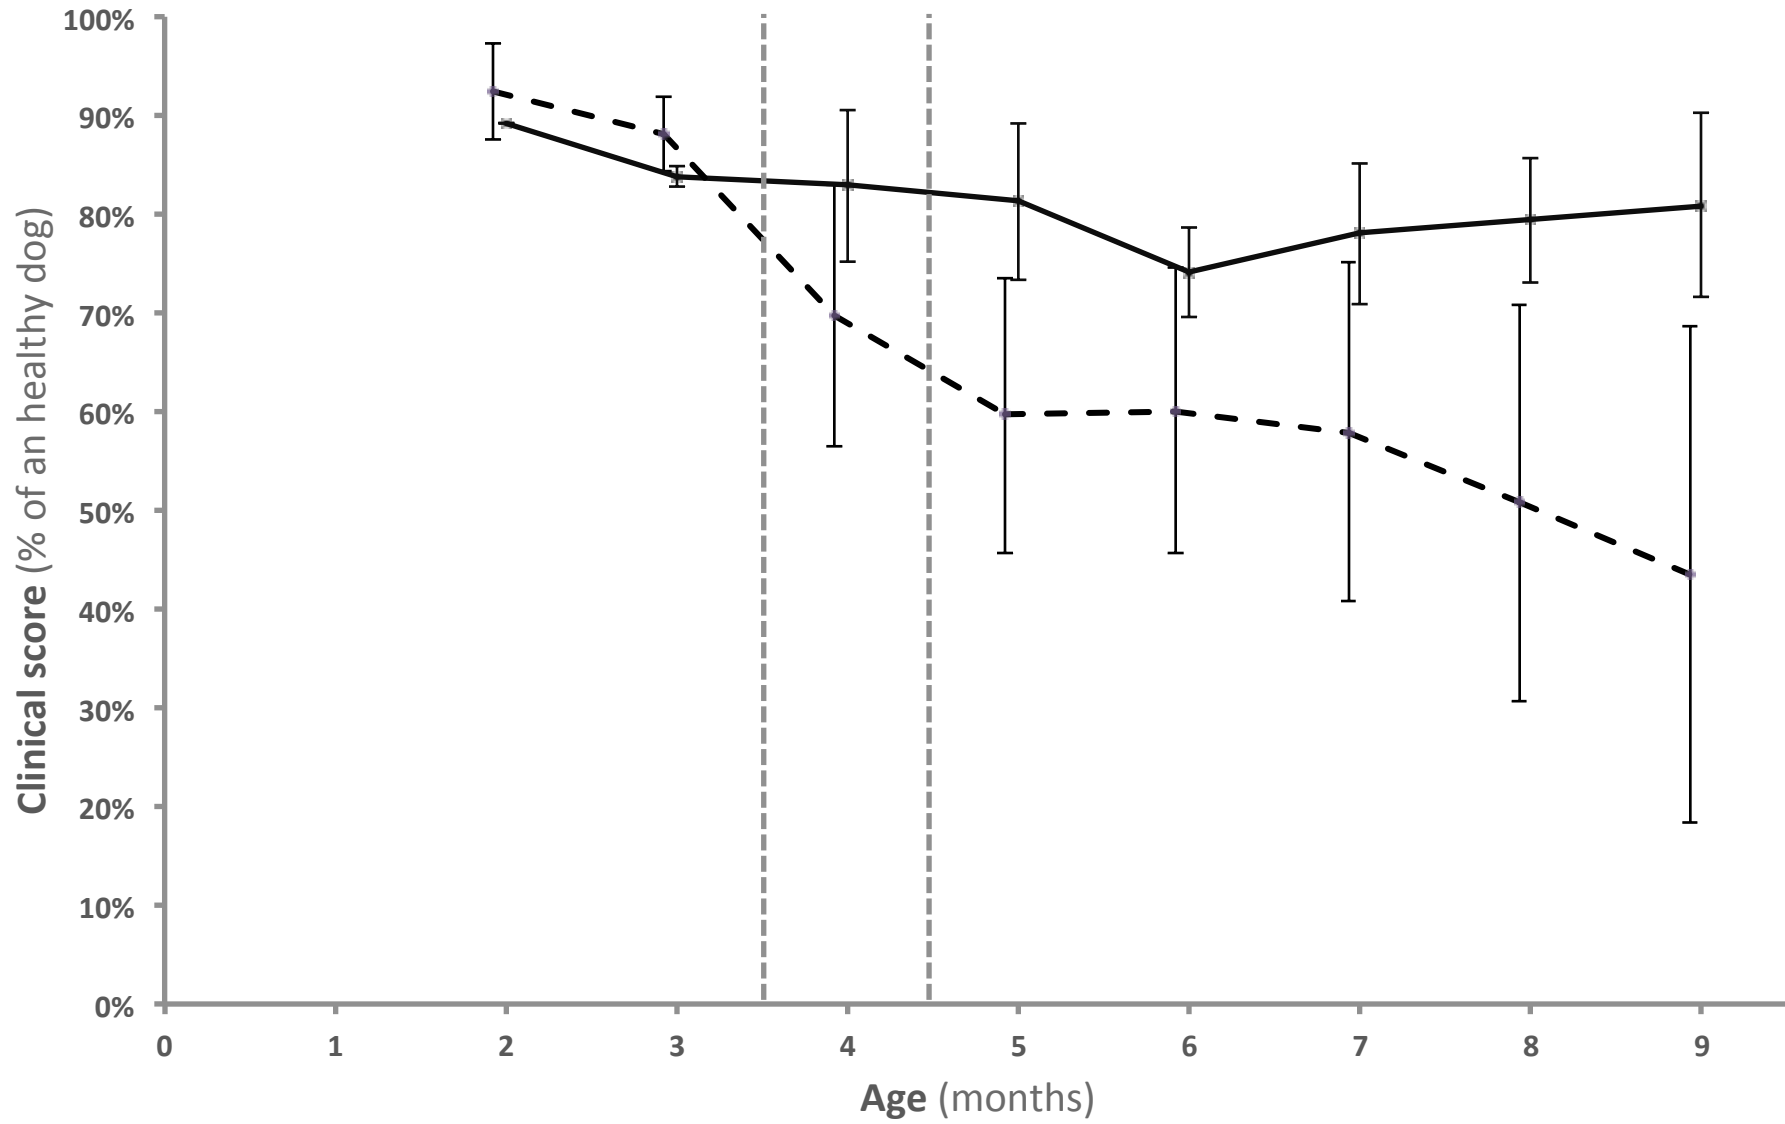

Supplement: MOESM2 [file 10111098]
